# Supplementary material for: Physico-chemical regulation of bacterial growth success under 3D confinement
Source: Royal Society of Chemistry journal article supplement (doi:10.1039/d5sm01082a), 2026-01-01
Supplement: d5sm01082a1.pdf [file d5sm01082a1.pdf]

## Supplementary Information for

### Physico-chemical regulation of bacterial growth success under 3D confinement

Nikita Bagade<sup>1</sup>, M Sreepadmanabh<sup>1</sup>, Gokulnath Ganesan<sup>1</sup>, and Tapomoy Bhattacharjee<sup>1,\*</sup>

<sup>1</sup> National Centre for Biological Sciences, Tata Institute of Fundamental Research, Bangalore, 560065, India

\*To whom correspondence should be addressed [tapa@ncbs.res.in](mailto:tapa@ncbs.res.in)

| Material property           | 3D growth matrix                                                                                                 | Mucosal samples                                                                       | References                                                                                                                                                                                                                 |
|-----------------------------|------------------------------------------------------------------------------------------------------------------|---------------------------------------------------------------------------------------|----------------------------------------------------------------------------------------------------------------------------------------------------------------------------------------------------------------------------|
| Stiffness (elastic modulus) | Low confinement, $G' \sim 10$ Pa<br><br>High confinement, $G' \sim 110$ Pa                                       | Pig small intestine mucus<br><br>Soft, $G' \sim 10$ Pa<br><br>Stiff, $G' \sim 100$ Pa | 3D matrix <sup>31,60,61</sup> :<br>Bhattacharjee & Datta, 2019b, 2019a;<br>Sreepadmanabh et al., 2024<br><br>Mucosal samples <sup>30,62,63</sup> : Nordgård & Draget, 2015; Sardelli et al., 2019;<br>Sellers et al., 1991 |
| Porosity (nano-scale)       | Polymeric mesh size<br>$\sim 40$ -100 nm                                                                         | Nanometer-scale pores in human cervicovaginal mucus                                   | 3D matrix <sup>31,60,61</sup> :<br>Bhattacharjee & Datta, 2019b, 2019a;<br>Sreepadmanabh et al., 2024<br><br>Mucosal samples <sup>64</sup> :<br>Lai et al., 2010                                                           |
| Porosity (micron-scale)     | Interparticle pore spaces<br><br>Low confinement ( $\sim 5$ microns)<br><br>High confinement ( $\sim 2$ microns) | Micron-scale pores in pig jejunum, pig ileum, and human ileum                         | 3D matrix <sup>31,60,61</sup> :<br>Bhattacharjee & Datta, 2019b, 2019a;<br>Sreepadmanabh et al., 2024<br><br>Mucosal samples <sup>65</sup> :<br>Krupa et al., 2020                                                         |
| Charge density              | Negatively charged polymeric network (Carbopol 980)                                                              | Negatively charged mucins                                                             | 3D matrix <sup>31,60,61</sup> :<br>Bhattacharjee & Datta, 2019b, 2019a;<br>Sreepadmanabh et al., 2024<br><br>Mucosal samples <sup>66,67</sup> :<br>Boegh & Nielsen, 2015; McShane et al., 2021                             |

**SI Table 1.** Rheological properties comparing the 3D growth media against natural mucosal samples.

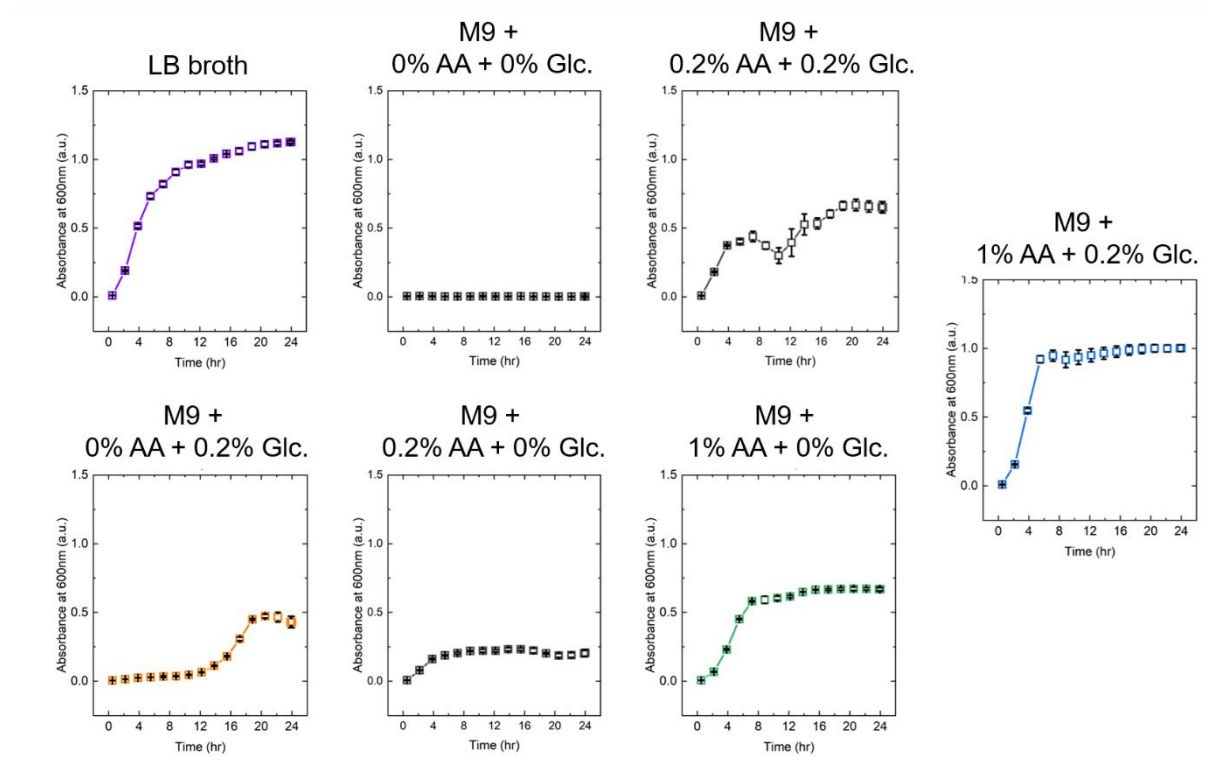

**SI Fig. 1** Shaken liquid growth assays evaluating the growth of *E. coli*  $\Delta$ flhDC across different nutrient conditions.

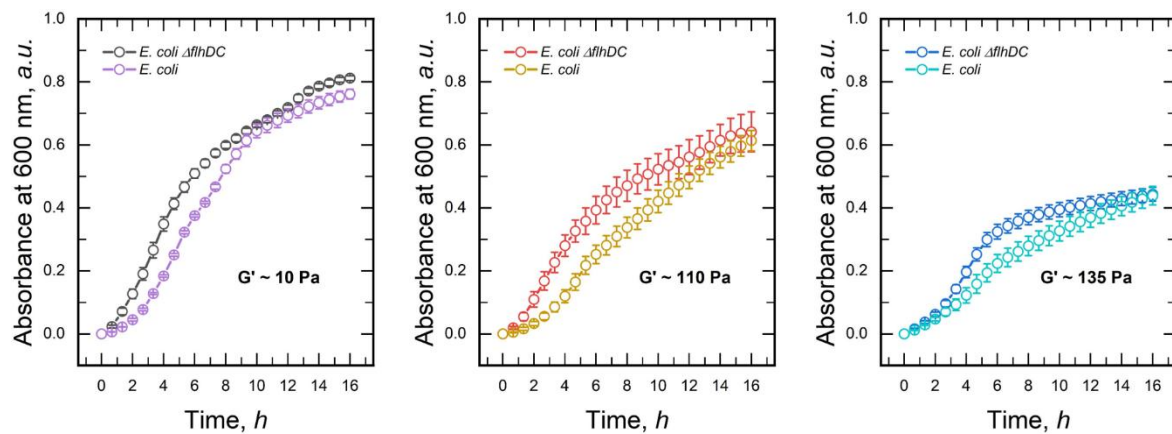

**SI Fig. 2** Motility does not confer significantly greater fitness benefits under confinement, as tested using a motile and non-motile strain of *E. coli* (the latter carries a deletion in the flagellar protein-encoding gene flhDC), which show no significant differences between the strains across low, high, and very high degrees of confinement.

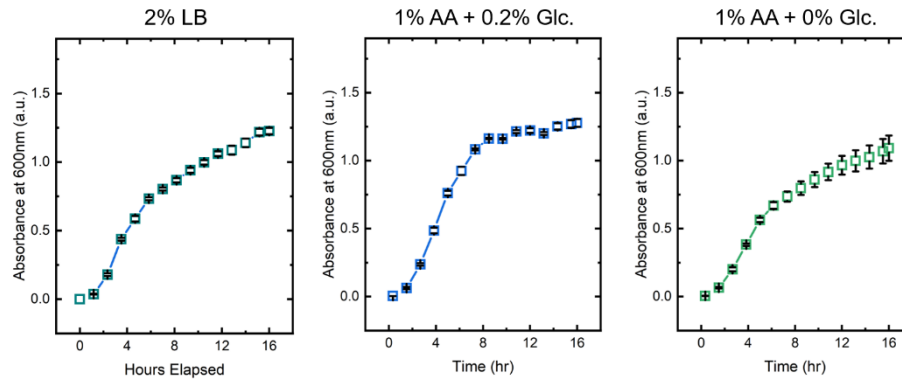

**SI Fig. 3** Shaken liquid growth assays evaluating the growth of *E. faecalis* across different nutrient conditions.

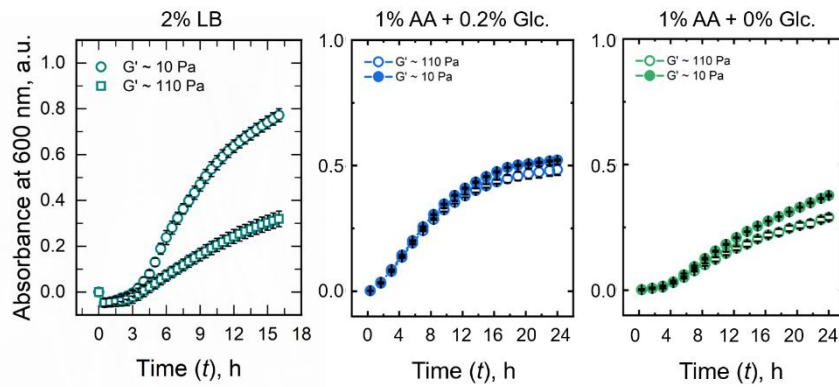

**SI Fig. 4** Growth assays performed using 3D matrices comparing the growth of *E. faecalis* between low and high degrees of physical confinement across different nutrient conditions.
